# Supplementary material for: Genome of Paulownia (Paulownia fortunei) illuminates the related transcripts, miRNA and proteins for salt resistance
Source: PubMed Central journal article supplement (PMC5430789; doi:10.1038/s41598-017-01360-9), 2017-04-28
Supplement: 41598_2017_1360_MOESM1_ESM.pdf [file 41598_2017_1360_MOESM1_ESM.pdf]

**Full title:**

Genome of Paulownia (*Paulownia fortunei*) illuminates the related transcripts,  
miRNA and proteins for salt resistance

**Authors:**

Guoqiang Fan<sup>1, #, \*</sup>, Limin Wang<sup>1, #</sup>, Yanpeng Dong<sup>1, #</sup>, Zhenli Zhao<sup>1</sup>, Minjie Deng<sup>1</sup>,  
Suyan Niu<sup>1</sup>, Xiaoshen Zhang<sup>2</sup>, Xibing Cao<sup>1</sup>

**Affiliations:**

1 Institute of Paulownia, Henan Agricultural University, Zhengzhou, Henan, China

2 Zhengzhou Agriculture & Forestry Scientific Research Institute, Zhengzhou, Henan,  
China

<sup>#</sup> Equal contributors

<sup>\*</sup>Correspondence: Guoqiang Fan, Institute of Paulownia, Henan Agricultural University, Zhengzhou,  
Henan, China, Tel/Fax: 86+371- 6355-8605, E-mail: [zlx64@126.com](mailto:zlx64@126.com).

## **Supplementary Figures and Tables**

**Figure S1 Sequencing data assessment.** Base composition of clean data in PF2(a1), PF2S(b1), PF4(c1) and PF4S(d1); base quality of clean data in PF2(a2), PF2S(b2), PF4(c2) and PF4S(d2); reads distribution on PF2(a3), PF2S(b3), PF4(c3) and PF4S(d3) genes.

**Figure S2 Cluster analysis of DEGs in four comparisons: PF2S vs PF2, PF4S vs PF4, PF4 vs PF2 and PF4S vs PF2S.**

**Figure S3 Gene ontology analysis of DEGs in PF2S vs PF2(a) and PF4S vs PF4 (b).**

**Figure S4 The detailed information of four samples' proteins.** a: Distribution of protein's sequences coverage; b: peptide length distribution; c: protein mass distribution.

**Figure S5 COG and Gene ontology analysis (a:COG analysis, b:biological process; c: cellular component; d: molecular function) of all proteins.**

**Figure S6 Gene ontology function classification in all up-regulation(a), all down-regulation(b) and Autotetraploid predominant salt response key proteins(c).**

**Figure S7 Length distribution of miRNA(a) and the distribution of clean reads (b:PF2, c:PF2S, d:PF4, e:PF4S) across the different chromosomes.**

**Figure S8 The correlation between transcriptome and proteome.** Quantitative proteins and genes in PF2S vs PF2 (a1), PF4 vs PF2 (b1), PF4S vs PF2S(c1) and PF4S vs PF4 (d1); contrary expressional tendencies between proteins and genes in PF2S vs PF2 (a2), PF4 vs PF2 (b2), PF4S vs PF2S (c2) and PF4S vs PF4 (d2); same expressional tendencies between proteins and genes in PF2S vs PF2 (a3), PF4 vs PF2 (b3), (c3) PF4S vs PF2S and PF4S vs PF4 (d3).

**Table S1 Statistics of each sample comparing with Paulownia genome.**

**Table S2 Top 20 up and down differentially expressed genes in PF2S vs PF2, PF4 vs PF2, PF4S vs PF4 and PF4S vs PF2S.**

**Table S3 The significantly enriched GO terms of PF2S vs PF2 and PF4S vs PF4.**

**Table S4 The KEGG pathway enrichment distribution of PF2S vs PF2 and PF4S vs PF4.**

**Table S5 The identified transcription factor families in PF2S vs PF2 and PF4S vs PF4.**

**Table S6 Autotetraploid predominant salt response genes.**

**Table S7 The KEGG pathway enrichment distribution of Autotetraploid predominant salt response genes.**

**Table S8 The COG function classification and the KEGG pathway classification of all the proteins (a: COG function classification; b:KEGG pathway classification).**

**Table S9 The consistently different abundance proteins in PF4S vs PF2S, PF2S vs PF2 and PF4S vs PF4.**

**Table S10 The GO enrichment distribution(a) and KEGG pathway enrichment distribution (b) of Autotetraploid predominant salt response proteins.**

**Table S11 The miRNA statistics of four samples comparing with Paulownia genome.**

**Table S12 The identified conserved miRNA and novel miRNA in PF2, PF2S, PF4**

**and PF4S.**

**Table S13 The differentially expressed miRNA in PF2, PF2S, PF4 and PF4S.**

**Table S14 The sequence statistics of degradome comparing with Paulownia genome (a) and the predicted target genes of miRNA(b) .**

**Table S15 The statistics of miRNA-target mRNA/proteins in PF4S vs PF4 and PF2S vs PF2.**

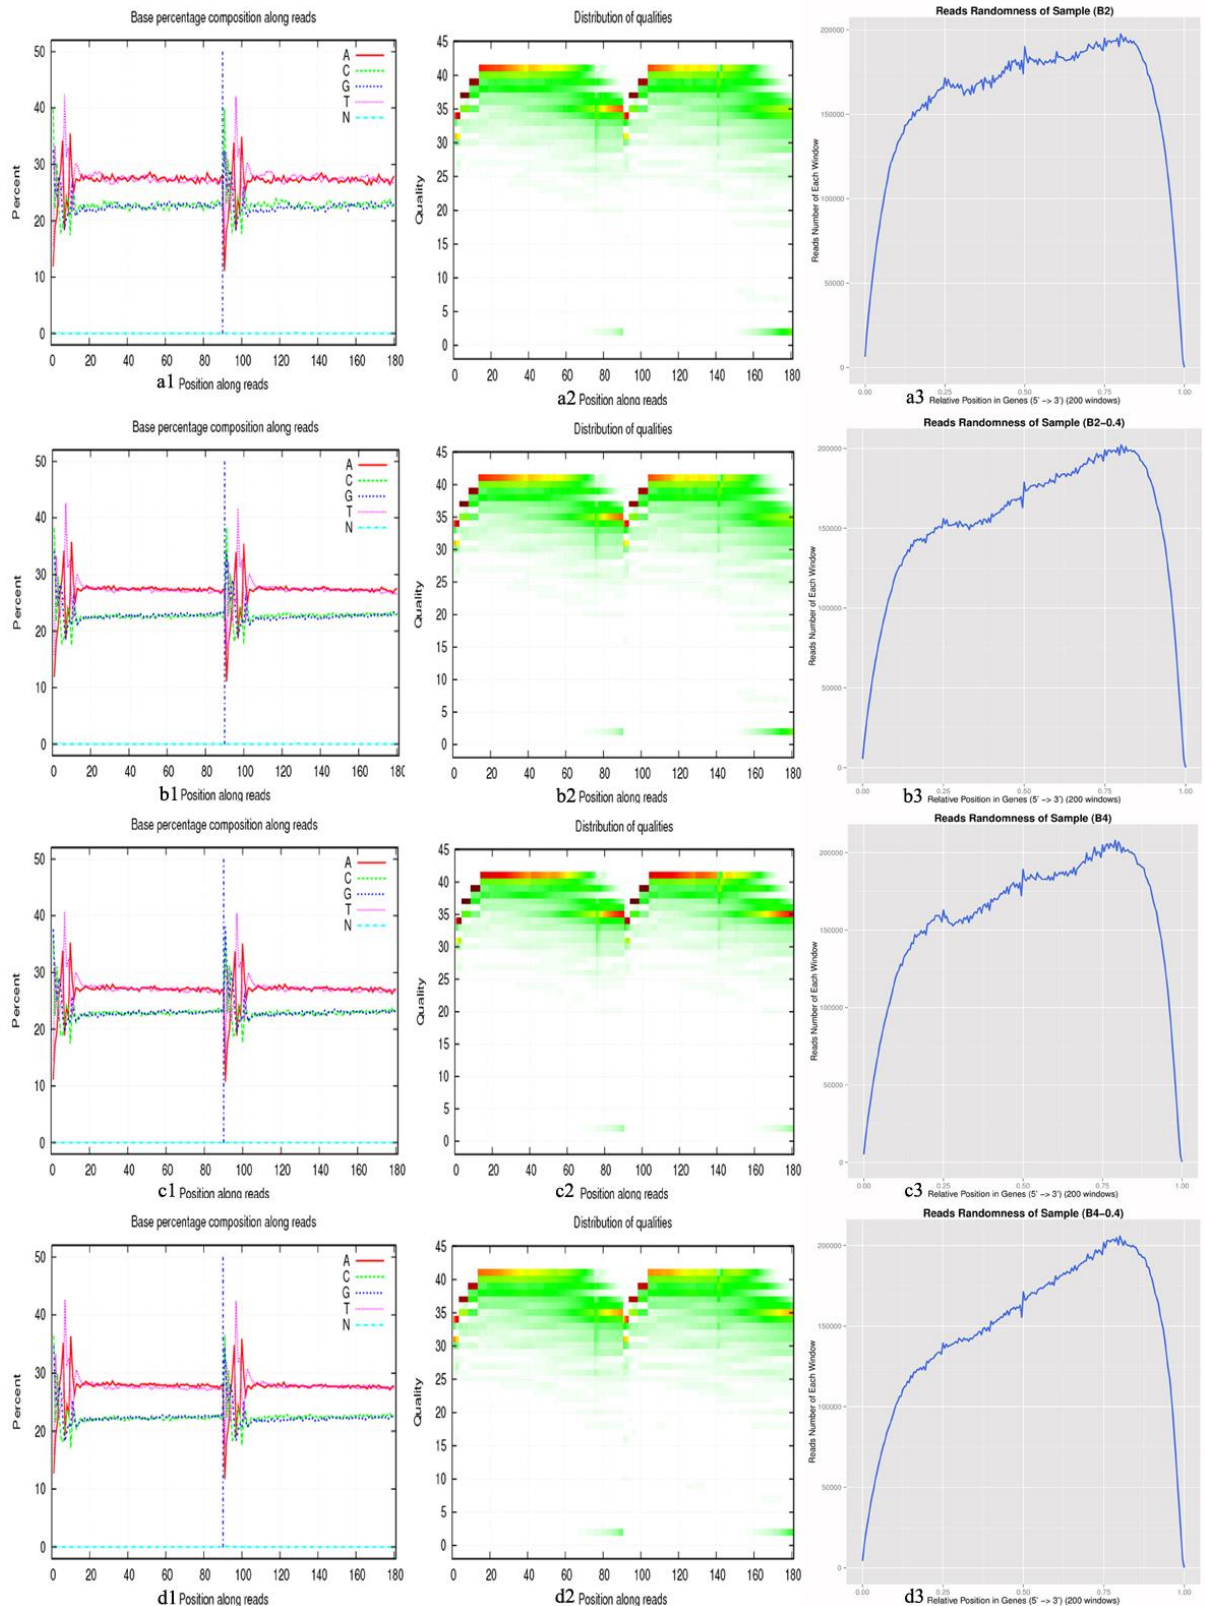

**Figure S1 Sequencing data assessment.** Base composition of clean data in PF2(a1), PF2S(b1), PF4(c1) and PF4S(d1); base quality of clean data in PF2(a2), PF2S(b2), PF4(c2) and PF4S(d2); reads distribution on PF2(a3), PF2S(b3), PF4(c3) and PF4S(d3) genes.

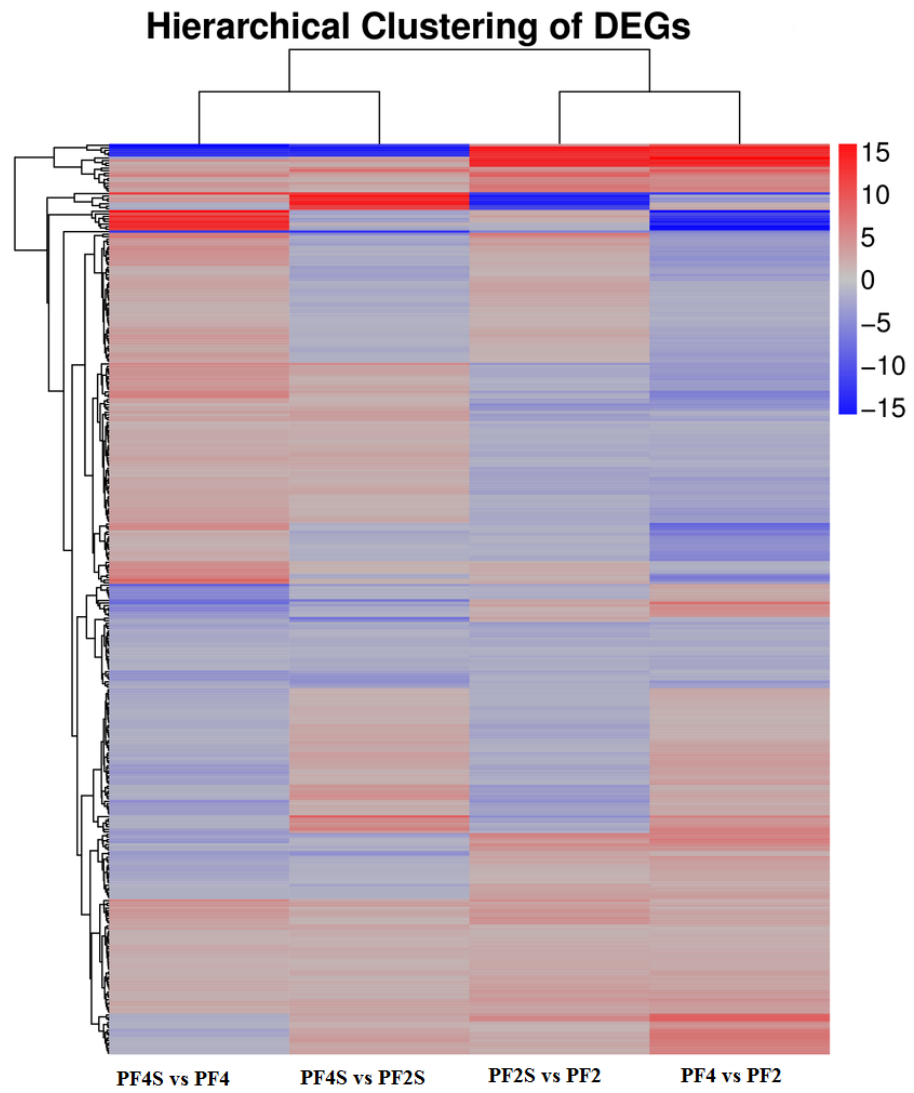

**Figure S2 Cluster analysis of DEGs in four comparisons: PF2S vs PF2, PF4S vs PF4, PF4 vs PF2 and PF4S vs PF2S.**

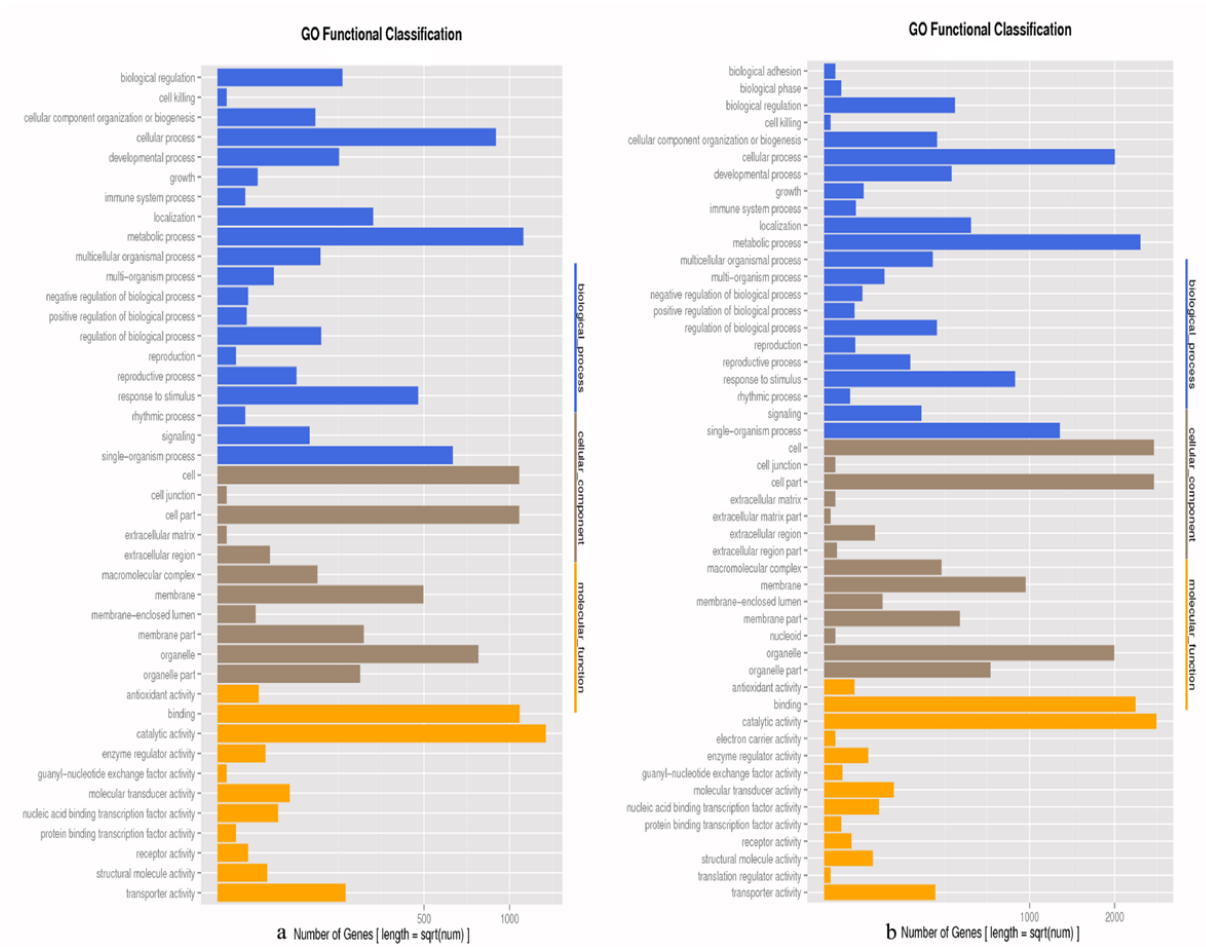

**Figure S3 Gene ontology analysis of DEGs in PF2S vs PF2(a) and PF4S vs PF4 (b).**

**Figure S4 The detailed information of four samples' proteins.** a: Distribution of Distribution of Protein's Sequences Coverage

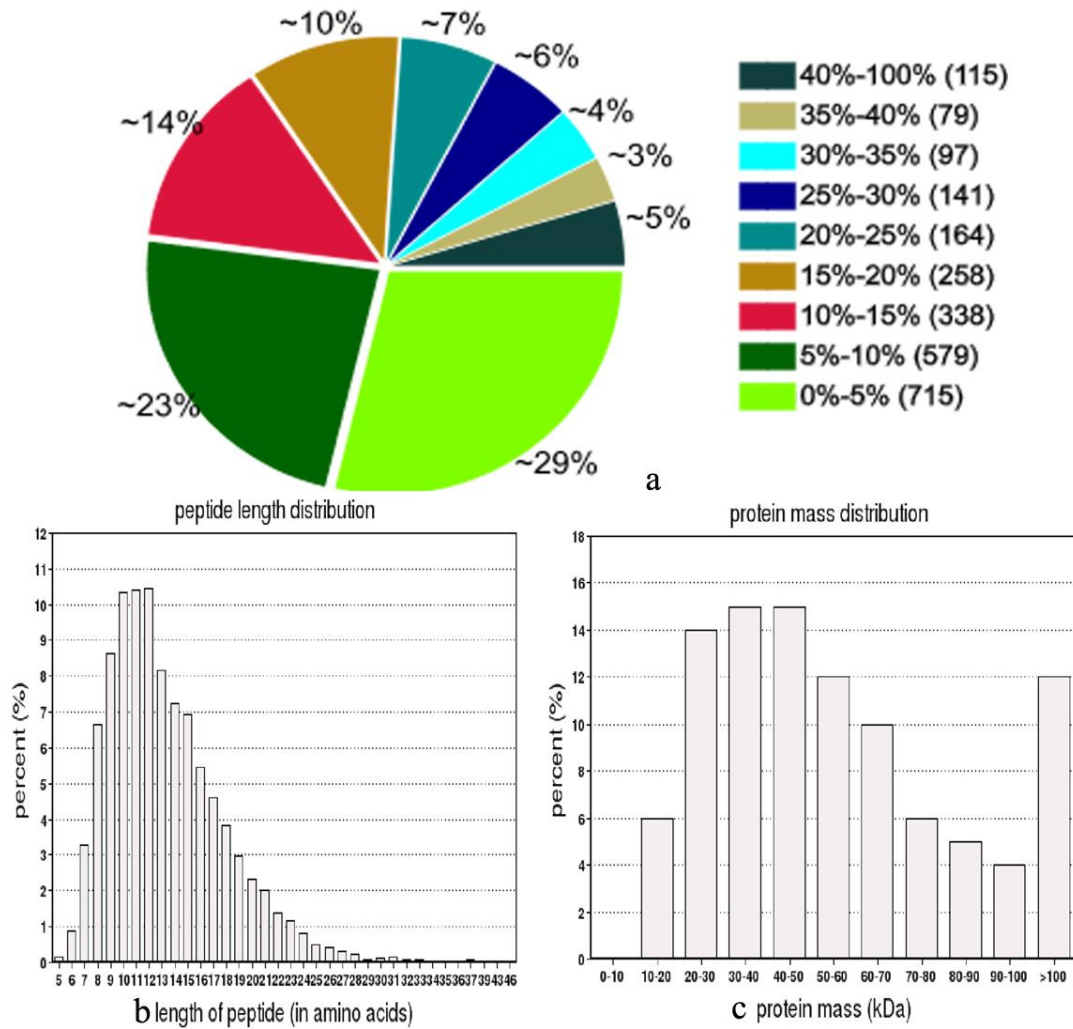

protein's sequences coverage; b: peptide length distribution; c: protein mass distribution.

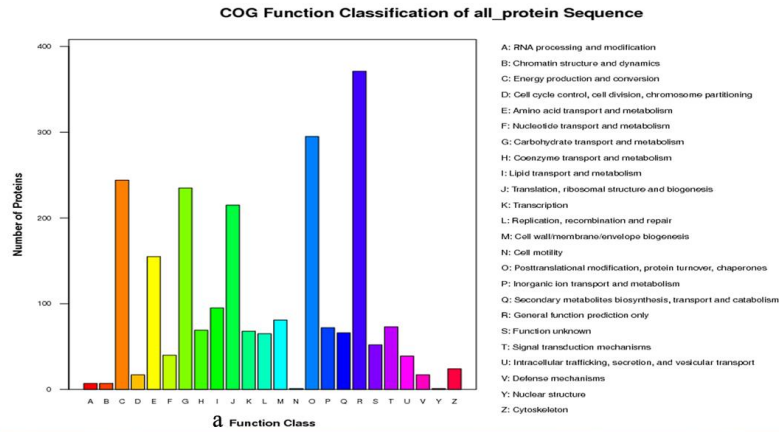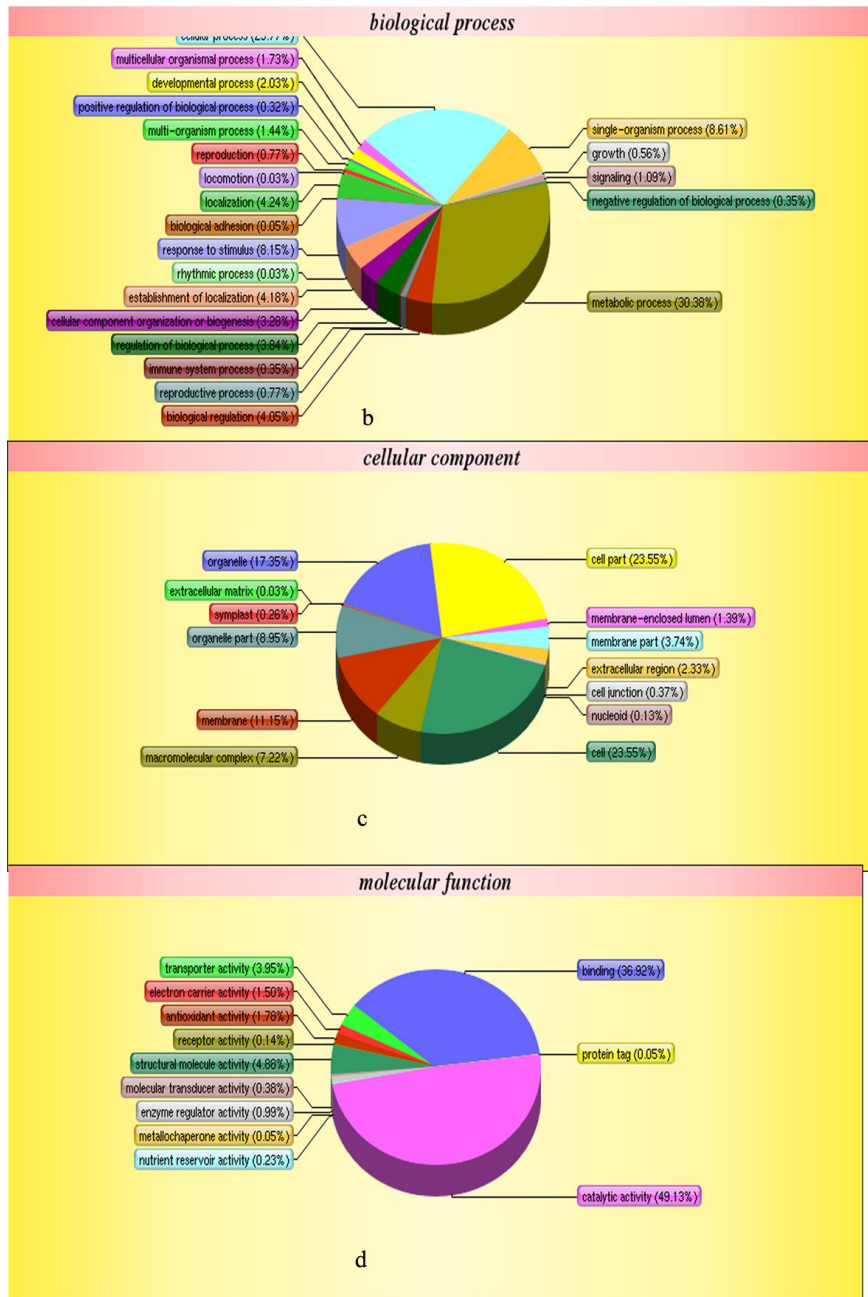

**Figure S5 COG and Gene ontology analysis (a:COG analysis, b:biological process; c: cellular component; d: molecular function) of all proteins.**



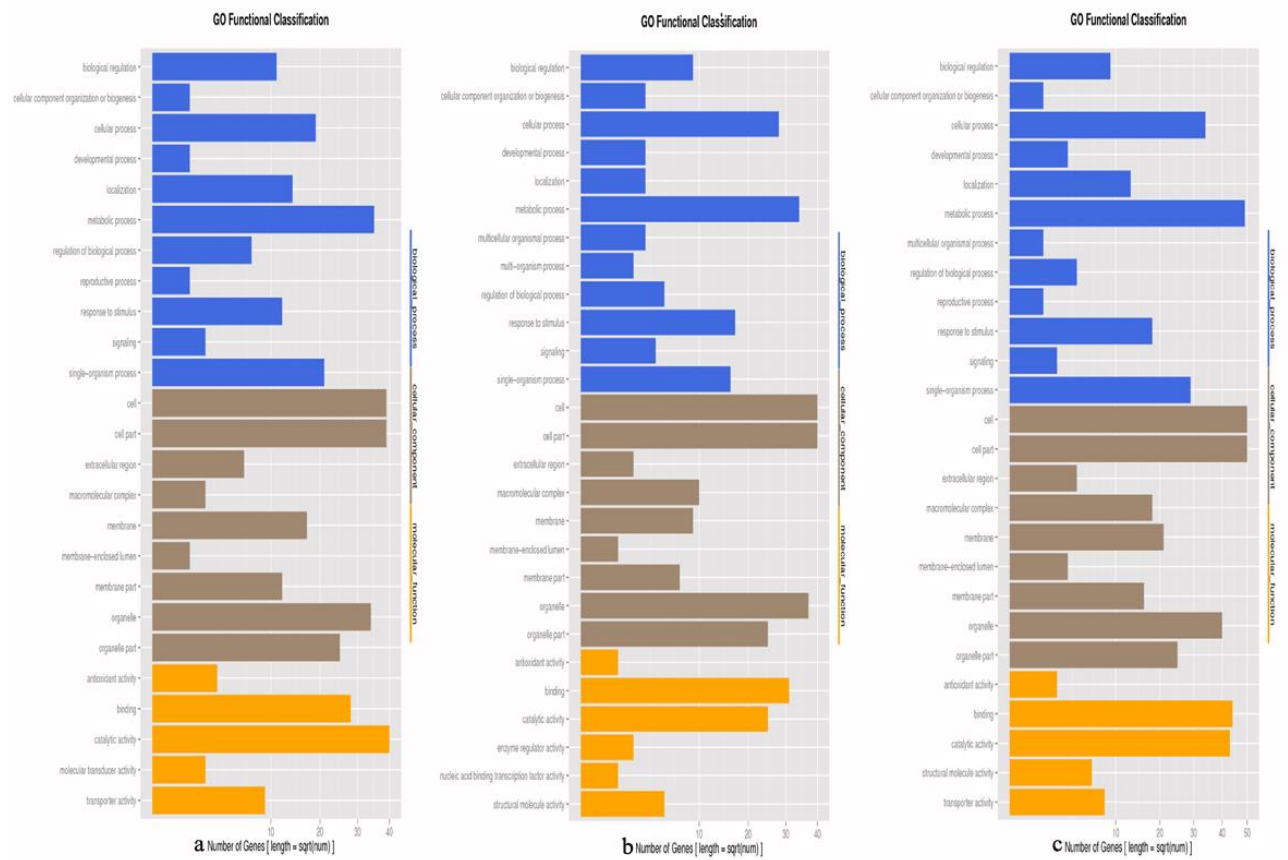

**Figure S6 Gene ontology function classification in all up-regulation(a), all down-regulation(b) and Autotetraploid predominant salt response key proteins(c).**

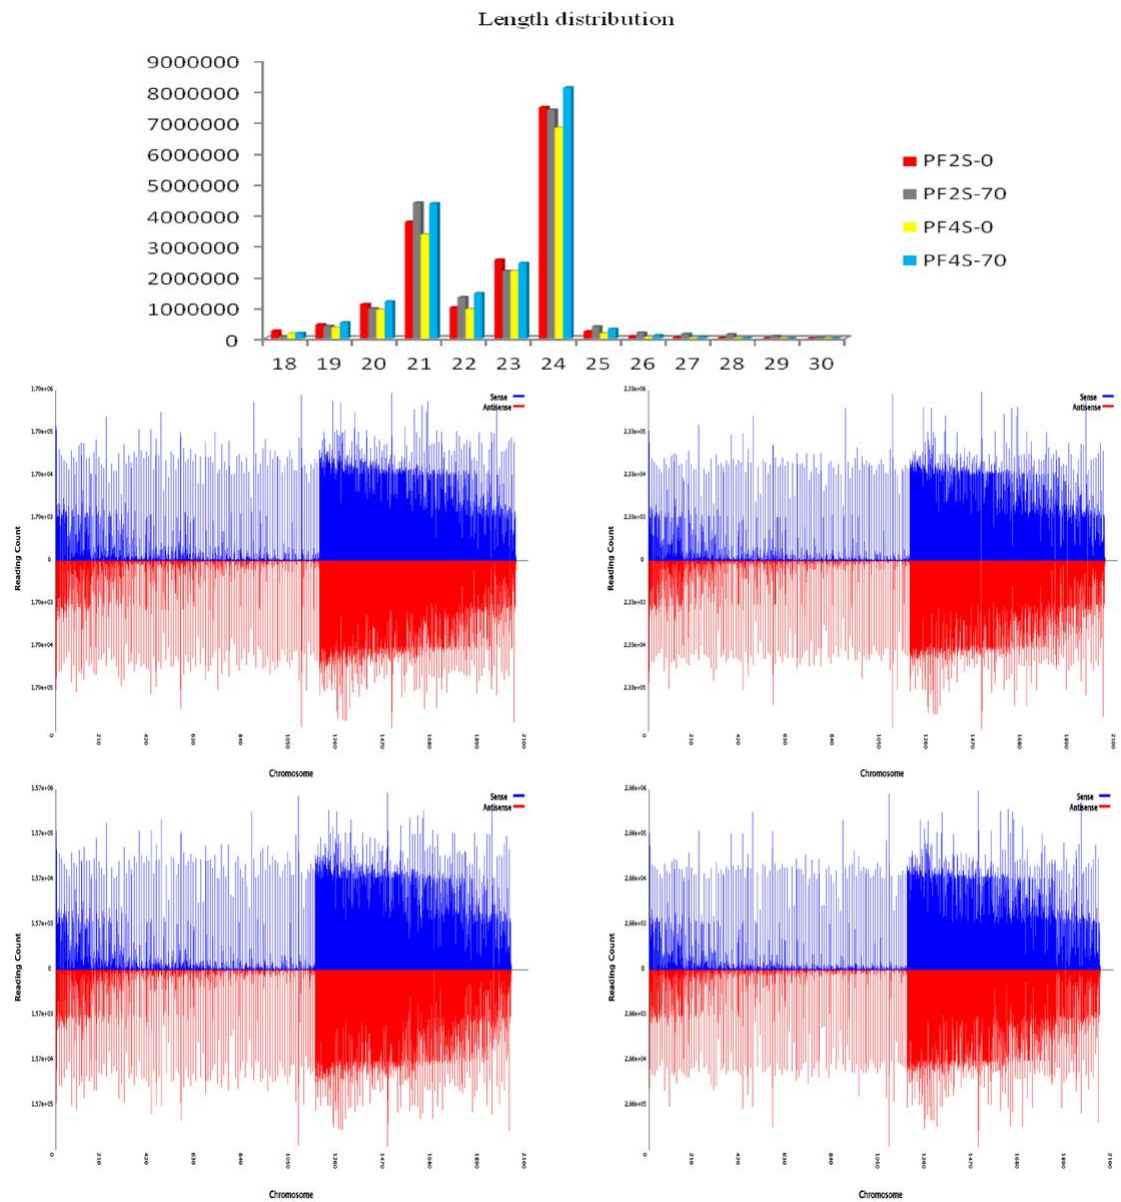

**Figure S7 Length distribution of miRNA(a) and the distribution of clean reads (b:PF2, c:PF2S, d:PF4, e:PF4S) across the different chromosomes.**

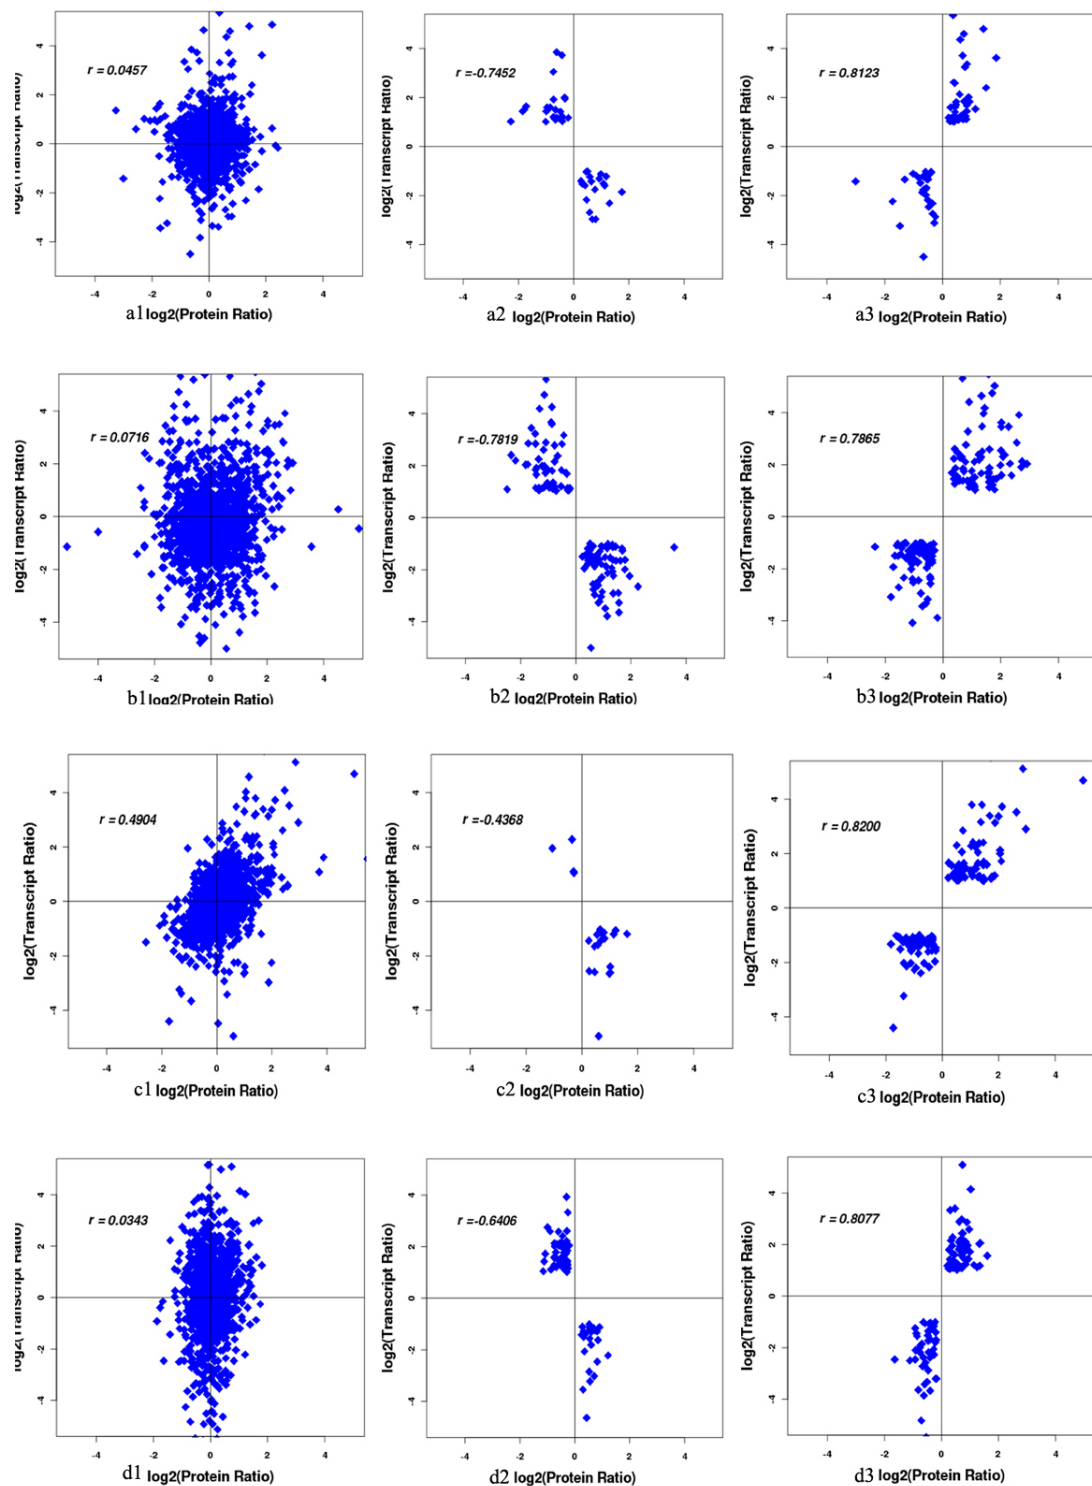

**Figure S8 The correlation between transcriptome and proteome.** Quantitative proteins and genes in PF2S vs PF2 (a1), PF4 vs PF2 (b1), PF4S vs PF2S(c1) and PF4S vs PF4 (d1); contrary expressional tendencies between proteins and genes in PF2S vs PF2 (a2), PF4 vs PF2 (b2), PF4S vs PF2S (c2) and PF4S vs PF4 (d2); same expressional tendencies between proteins and genes in PF2S vs PF2 (a3), PF4 vs PF2 (b3), (c3) PF4S vs PF2S and PF4S vs PF4 (d3).
